# Supplementary material
Source: PubMed Central journal article supplement (PMC2154467)
Supplement: supp_0704447104_04447Fig5.pdf [file supp_0704447104_04447Fig5.pdf]

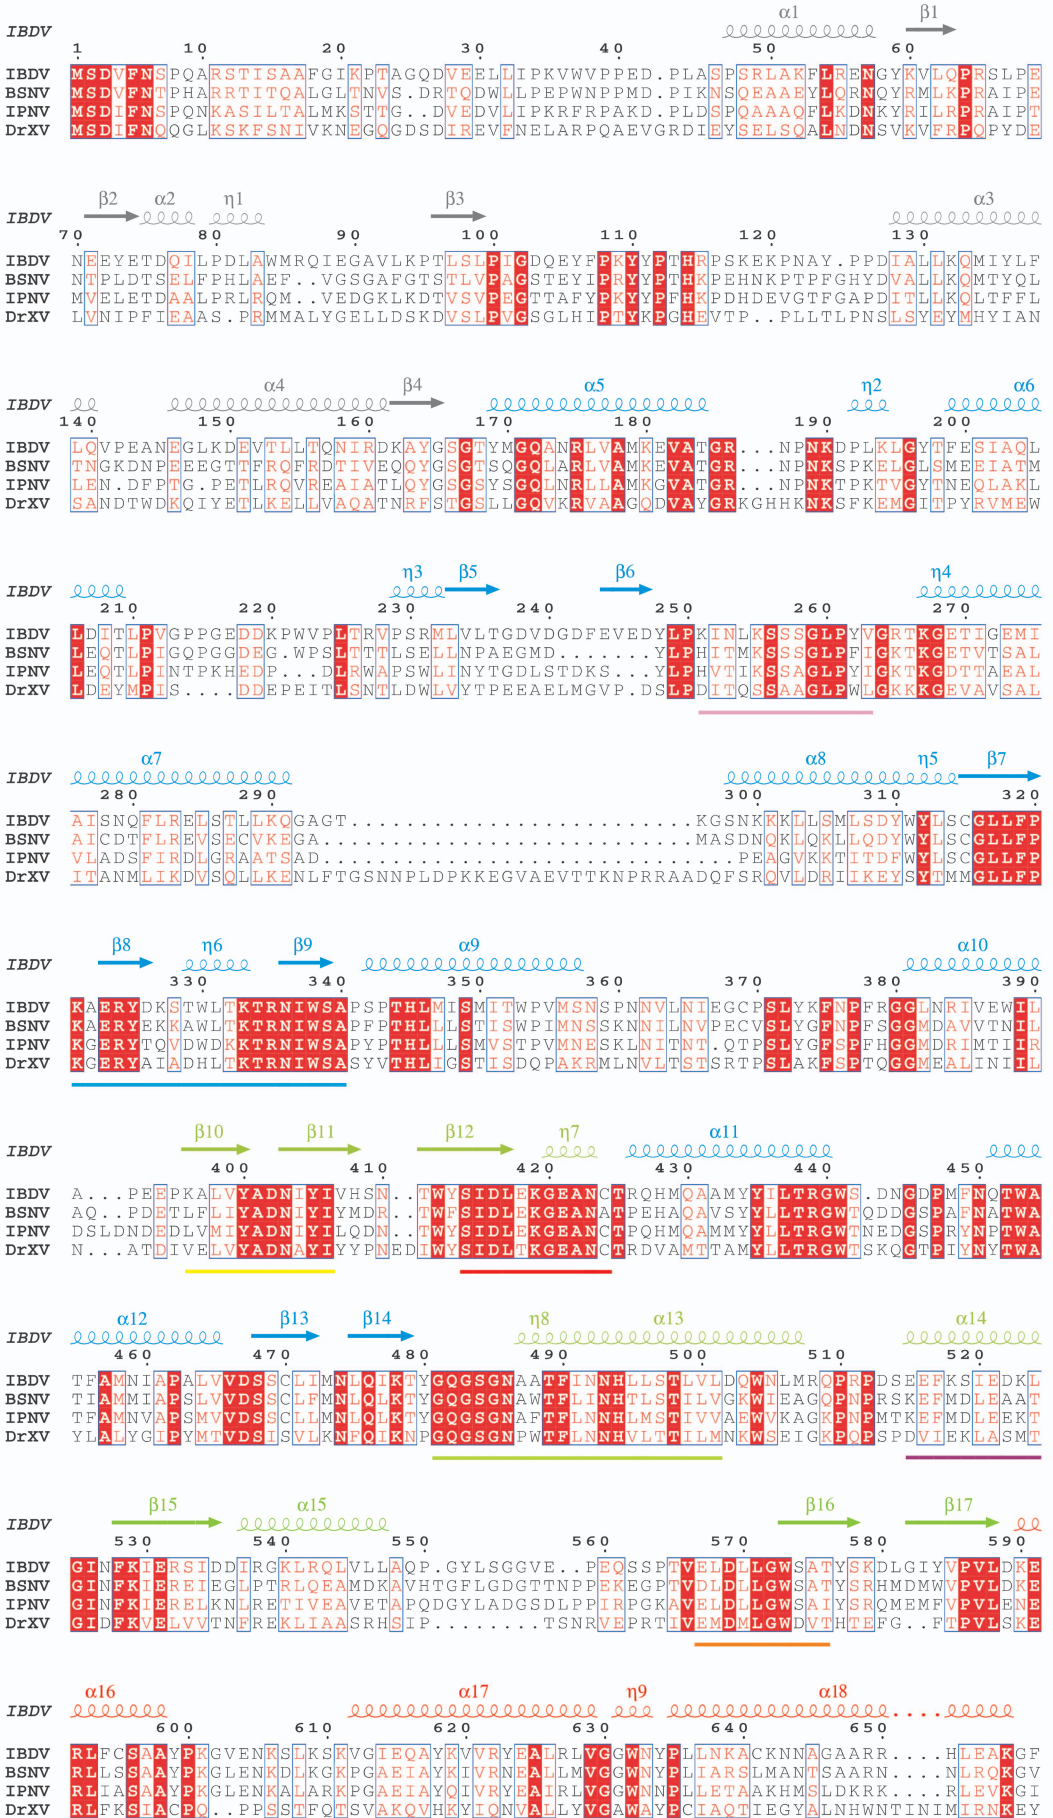

IBDV  $\alpha 19$   $\eta 10$   $\eta 11$   $\alpha 20$   $\alpha 21$

660 670 680 690 700 710

IBDV PLDEF LAEWSELSEFGEAFEG..FNIKLTVTSESLAELNKPVPKPK...PNVNR.PVNTGG..LKA<sup>V</sup>SNA

BSNV PLDTL TRDW<sup>E</sup>KMTE<sup>F</sup>SDIFEDLPIDTKLEVTS<sup>E</sup>F<sup>L</sup>QRLNLRGERKQ...PNV<sup>N</sup>KHHLRTKG..LKK<sup>C</sup>VSA

IPNV DV<sup>T</sup>GF<sup>L</sup>DDW<sup>N</sup>NMSE<sup>F</sup>GGDLE<sup>G</sup>..ITLSEPLTNQTLVDINTPLDSFD...PKAR<sup>P</sup>QTPRS<sup>R</sup>PKKTLD<sup>E</sup>VTTA

DrXV DL<sup>D</sup>KA<sup>I</sup>GKAV<sup>V</sup>EAS<sup>P</sup>FSEVISL<sup>L</sup>SLDR<sup>R</sup>PMH<sup>E</sup>QNYA<sup>Q</sup>VLY<sup>Q</sup>QKTI<sup>E</sup>KKEAK<sup>P</sup>K<sup>V</sup>S<sup>N</sup>PLY<sup>K</sup>R<sup>D</sup>KET<sup>Y</sup>H<sup>E</sup><sup>Y</sup>T<sup>T</sup>R

IBDV  $\alpha 0$

720

IBDV LK.....

BSNV LK.....

IPNV IT.....

DrXV MARRM<sup>R</sup>INDDMVGPQWEP<sup>I</sup>IINLVTKLYPREATGENQKSRESMTRVKIRGLLENMERQLESNGRSM<sup>D</sup>VWYNA

IBDV  $\alpha 22$   $\eta 12$   $\alpha 23$   $\alpha 24$

730 740 750 760 770 780

IBDV .....TGRYRNEAGLSGLVLLATARSRLQDAVKAKAEAEK<sup>L</sup>H<sup>K</sup>SKPDDPDADWFERSETLS<sup>D</sup>LLEKAD

BSNV .....QGACRNPTTVAGLKLTA<sup>Y</sup>SKSRINKAKAVFDEINNLPKT<sup>E</sup>SDDD...WSDRMDDADRLMKANN

IPNV .....SGTYKDPKSAVWRLLDQRTKLRVSTLRDQALALKPASSVDN...WABATEELAQ<sup>Q</sup>QQLLM

DrXV YLTGKKP<sup>S</sup>GV<sup>D</sup>K<sup>K</sup>L<sup>L</sup>AT<sup>L</sup>LV<sup>L</sup>L<sup>A</sup>PK<sup>R</sup>TK<sup>K</sup>LP<sup>S</sup>GV<sup>Y</sup>Q<sup>K</sup>LLGYPP<sup>I</sup>D<sup>K</sup>SPVPSLTSDEAYLYDTNSLEYNRIA

IBDV  $\alpha 25$

790 800 810 820 830 840

IBDV IAS<sup>K</sup>V<sup>A</sup>HSALV<sup>E</sup>TS<sup>D</sup>AL<sup>E</sup>AV<sup>Q</sup>STSV<sup>Y</sup>TPKYPEV<sup>K</sup>KNPQTAS<sup>N</sup>NPV<sup>V</sup>GLHLPA<sup>K</sup>RATGVQA<sup>A</sup>LL

BSNV LYM<sup>R</sup>EARSAL<sup>E</sup>EDVHNSLLALSGETV<sup>K</sup>AK<sup>A</sup>.KTPQEKSTEV<sup>S</sup>NPV<sup>V</sup>GYRLPA<sup>E</sup>RTGVQH<sup>A</sup>LL

IPNV KAN<sup>N</sup>L<sup>L</sup>KSSLT<sup>E</sup>TREALE<sup>T</sup>IQSDKIIAGKSNPEKNPGTAA<sup>N</sup>NPV<sup>V</sup>GYGEFS<sup>E</sup>KI<sup>I</sup>PLTPT<sup>Q</sup>KK

DrXV YVS<sup>K</sup>L<sup>L</sup>NEDDIT<sup>T</sup>VYANK<sup>Y</sup>MV<sup>Y</sup>SSTL<sup>L</sup>LSN<sup>L</sup>LLPDKV<sup>D</sup>WP<sup>E</sup>LS<sup>R</sup>MN<sup>V</sup>EGASDPY<sup>Q</sup>V<sup>K</sup>GYK<sup>K</sup>EL<sup>K</sup>
