# Supplementary material
Source: PubMed Central journal article supplement (PMC2154467)
Supplement: supp_0704447104_04447Fig8.pdf [file supp_0704447104_04447Fig8.pdf]

## Motif A

IBDV 414 S **ID** L **E** K G **EA** N C 424  
FMDV 238 D **VD** Y **S** K F **DA** N H 248  
Phi6 322 A **TD** V **S** D H **DT** F W 332

## Motif B

IBDV 481 **G** Q G **SG** N A **AT** F **I** N **NHL** L S **TL** V L 501  
FMDV 295 **G** M P **SG** C S **AT** S **I** I **NTIL** N **NI** Y V 315  
Phi6 390 **G** L S **SG** Q G **AT** D **L** M **GTL** L M **SI** T Y 410

## Motif C

IBDV 396 **K** A **LVY** A **DNI** Y **I** 406  
FMDV 332 **T** M **ISY** G **DDI** V **V** 342  
Phi6 447 **R** Q **ISK** S **DDA** M **L** 457

## Motif E

IBDV 567 E L D **LL** G W S A T 576  
FMDV 382 D V T **FL** K R H F H 391  
Phi6 493 G G A **FL** G D I L L 502

## Motif F

IBDV 321 **K** A **ER** Y D K S T . W L T K **TR** N **I** W S A 340  
FMDV 164 **K** D **EI** R P M G K V R A G K **TR** I **V** D V L 184  
Phi6 204 **R** A **QS** T D - (inser) - C **RR** T **A** M G E 275

## Motif G

IBDV 251 **K** I N L K **SS** S G L **PY** V 263  
FMDV 110 **A** M E P D **TA** P G L **PW** A 122  
Phi6 144 **K** I R K G **SS** T C I **PY** F 156
