# Supplementary material
Source: PubMed Central journal article supplement (PMC2154467)
Supplement: supp_0704447104_04447Table1.pdf [file supp_0704447104_04447Table1.pdf]

---

|                  |       |       |       |
|------------------|-------|-------|-------|
| Bond lengths (Å) | 0.006 | 0.009 | 0.006 |
| Bond angles (°)  | 0.920 | 1.257 | 0.962 |

---

\*Highest-resolution shell is shown in parentheses.
