# Supplementary material
Source: PubMed Central journal article supplement (PMC2154467)
Supplement: supp_0704447104_04447Table2.pdf [file supp_0704447104_04447Table2.pdf]

**Table 2. DALI scores and distance rmsd for IBDV VP1 compared with other polymerases (1)**

|                                             | FMDV | NV   | HCV | BVDV | $\phi 6$ | $\lambda 3$ |
|---------------------------------------------|------|------|-----|------|----------|-------------|
| <b>Equivalent C<math>\alpha</math> atom</b> | 398  | 392  | 285 | 269  | 386      | 211         |
| <b>DALI score</b>                           | 14.7 | 14.3 | 9.8 | 11.0 | 9.3      | 5.2         |
| <b>rmsd, Å</b>                              | 2.9  | 3.1  | 3.5 | 3.8  | 3.5      | 4.1         |

The structure of IBDV VP1 was compared to other polymerases from different viral families: the picornavirus FMDV (PDB code 1WNE), the calicivirus Norwalk virus (NV) (PDB code 1SH2), the flaviviruses hepatitis C virus (HCV) (PDB code 1GX5) and bovine diarrhea disease virus (BVDV) (PDB code 1S49), the bacteriophage  $\Phi 6$  (PDB code 1HHT), and the reovirus  $\lambda 3$  (PDB code 1N1H).

1. Holm L, Sander C (1995) *Trends Biochem Sci* 20:478-480.
