# Supplementary material
Source: PubMed Central journal article supplement (PMC2154467)

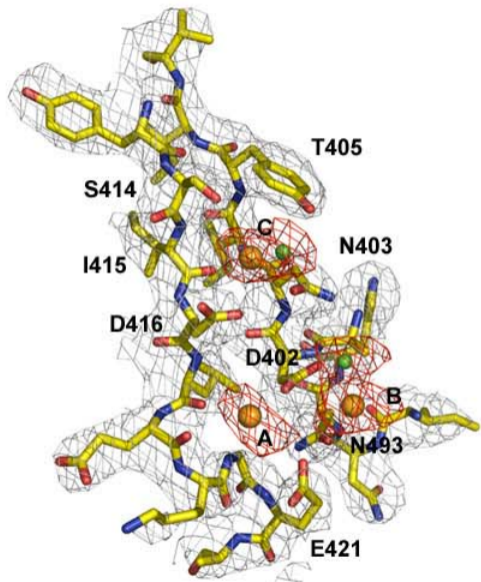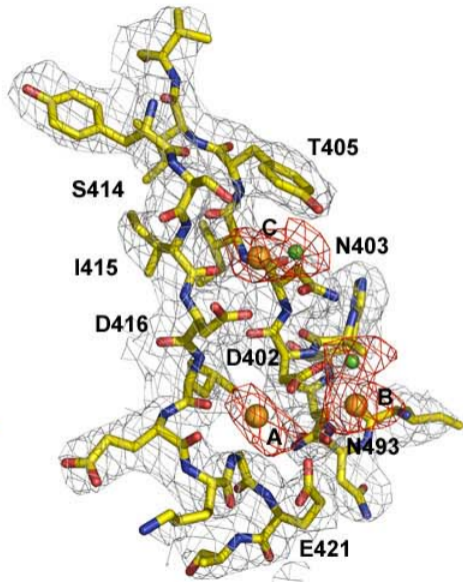

Supplement: supp_0704447104_04447Fig6.pdf [file supp_0704447104_04447Fig6.pdf]

**a**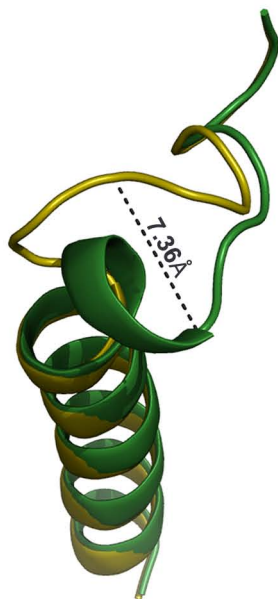**b**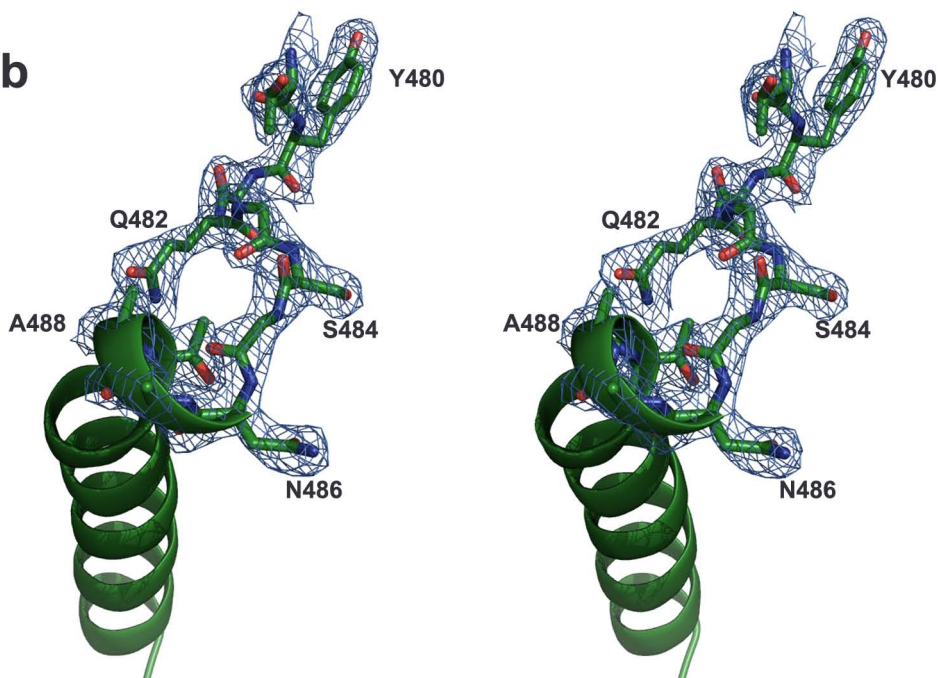**c**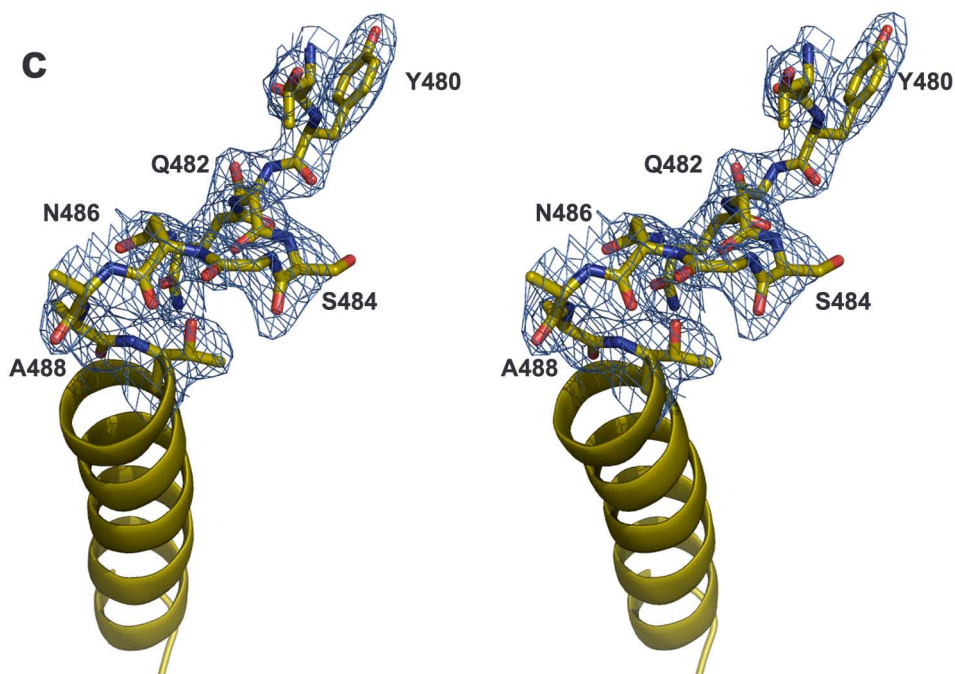

Supplement: supp_0704447104_04447Fig7.pdf [file supp_0704447104_04447Fig7.pdf]
